# Supplementary material for: Leptin ameliorates ischemic necrosis of the femoral head in rats with obesity induced by a high-fat diet
Source: PubMed Central journal article supplement (PMC4369691; doi:10.1038/srep09397), 2015-03-23
Supplement: srep09397-s1.pdf [file srep09397-s1.pdf]

# Leptin ameliorates ischemic necrosis of the femoral head in rats with obesity induced by a high-fat diet

Lu Zhou<sup>1,4</sup>, Kyu Yun Jang<sup>2</sup>, Young Jae Moon<sup>3</sup>, Sajeew Wagle<sup>1</sup>, Kyoung Min Kim<sup>2</sup>

Kwang Bok Lee<sup>1</sup>, Byung-Hyun Park<sup>3</sup>, Jung Ryul Kim<sup>1,\*</sup>

<sup>1</sup>Department of Orthopaedic Surgery, Chonbuk National University Medical School, Research Institute for Endocrine Sciences and Research Institute of Clinical Medicine, Jeonju, Republic of Korea

<sup>2</sup>Department of Pathology, Chonbuk National University Medical School, Research Institute for Endocrine Sciences and Research Institute of Clinical Medicine, Jeonju, Republic of Korea

<sup>3</sup>Department of Biochemistry, Chonbuk National University Medical School, Research Institute for Endocrine Sciences, Jeonju, Republic of Korea

<sup>4</sup>Department of Sports Medicine, Taishan Medical University, Shandong, China

\*Corresponding author:

Jung Ryul Kim, MD, PhD

Department of Orthopaedic Surgery, Chonbuk National University Medical School,

567 Baekje-daero, Deokjin-gu, Jeonju, 561-756, Republic of Korea.

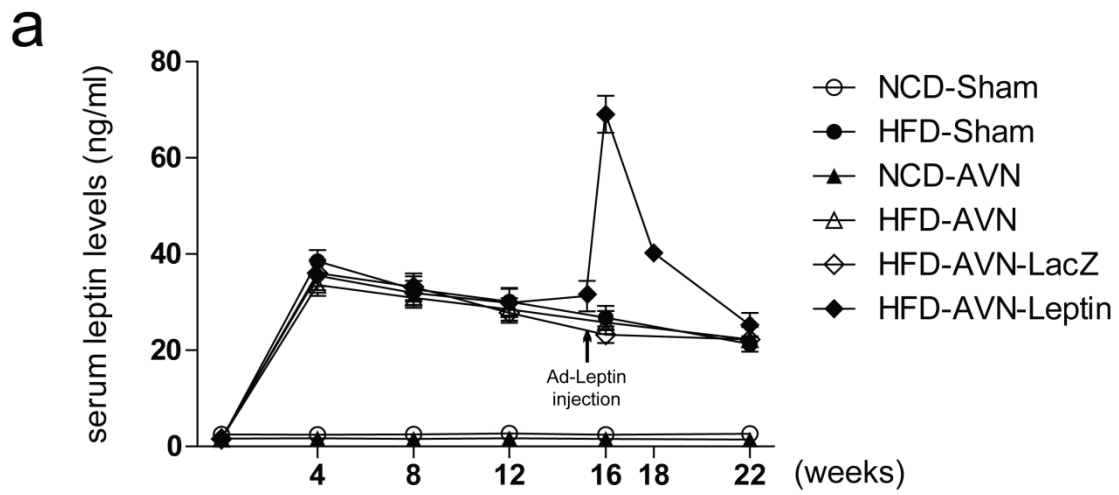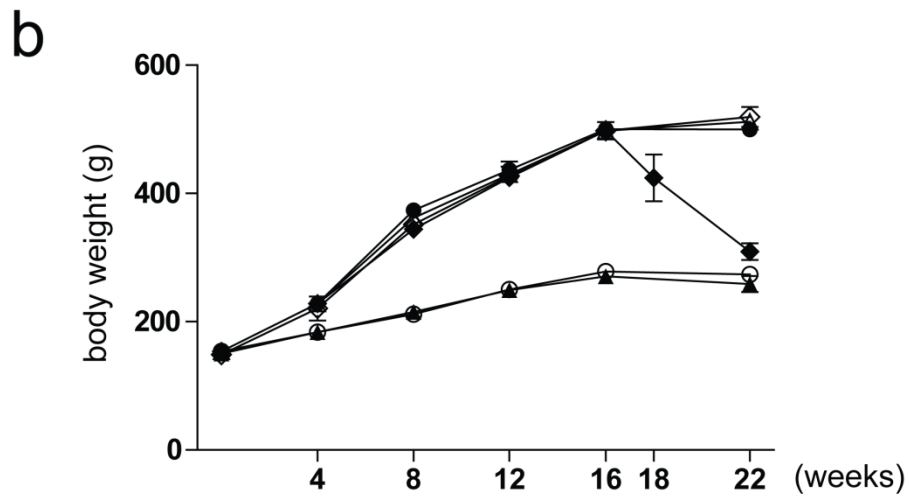

**Supplementary Figure 1. Plasma leptin and body weight.** Plasma leptin levels (A) and body weight (B) were measured in each group. Values represent mean  $\pm$  SEM for four animals in each group.

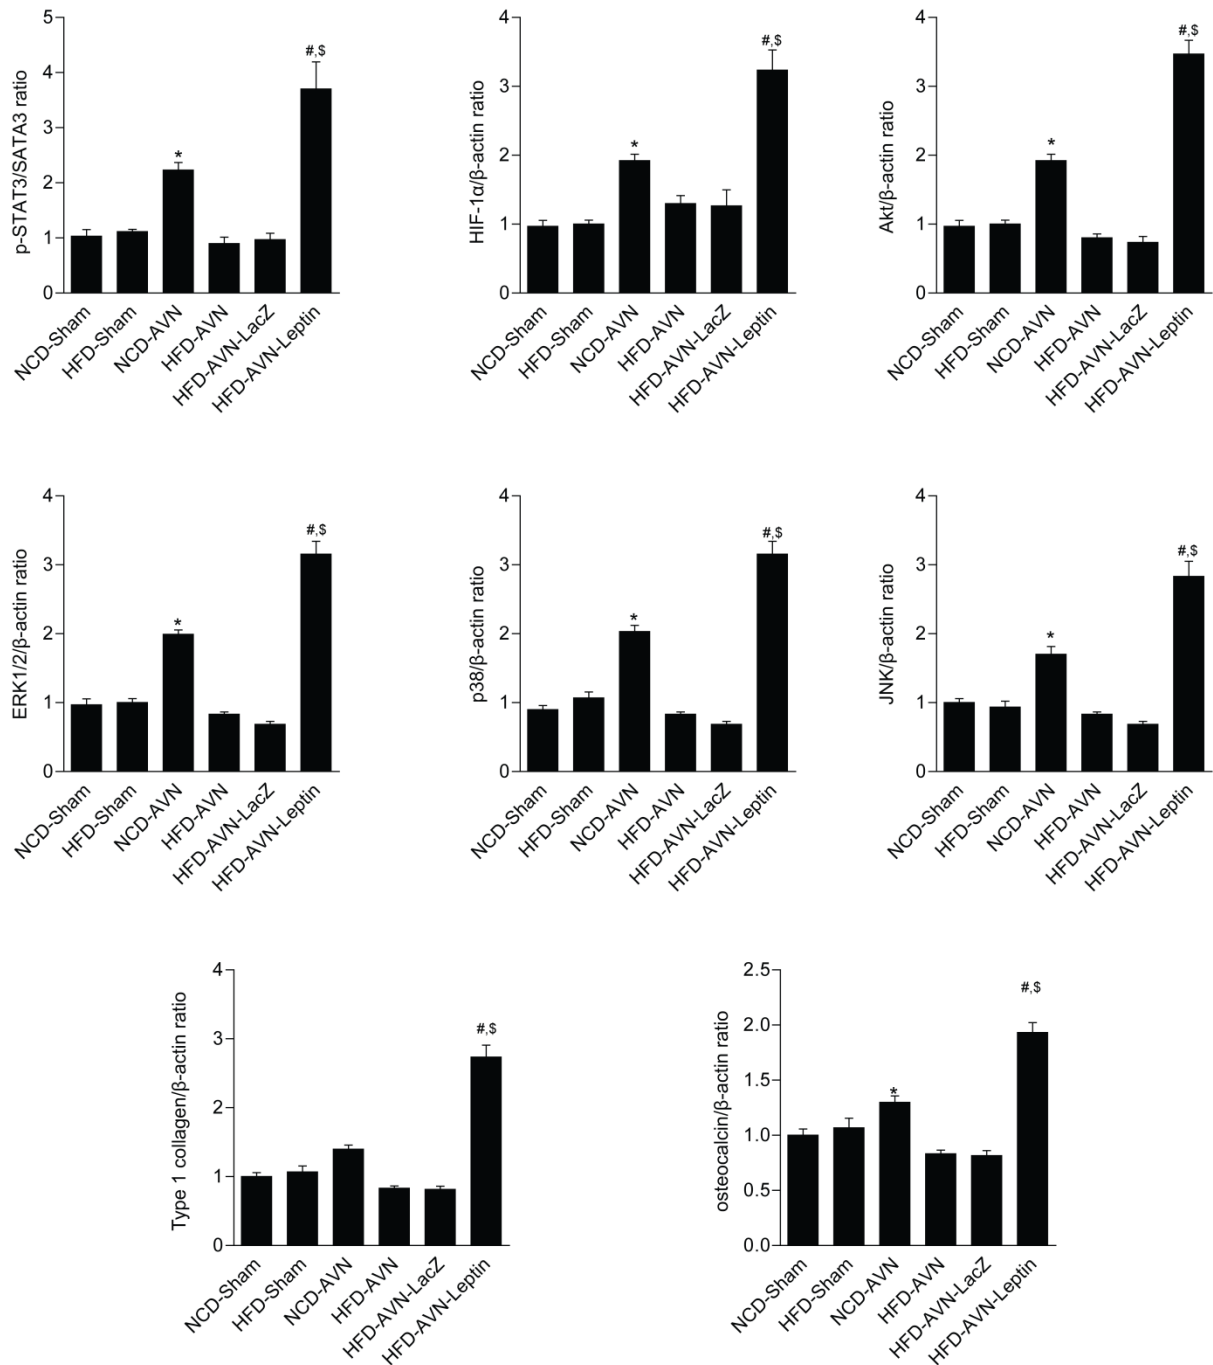

**Supplementary Figure 2. Western blot analysis indicates both canonic and noncanonical leptin signaling pathways in the groups, respectively.** The protein content was calculated by gray scale. Data are expressed as the mean SEM (n = 5 per group). \*, p < 0.05 vs. NCD-Sham; #, p < 0.05 vs. NCD-AVN; \$, p < 0.01 vs. NCD-AVN; &, p < 0.01 vs. HFD-AVN-LacZ

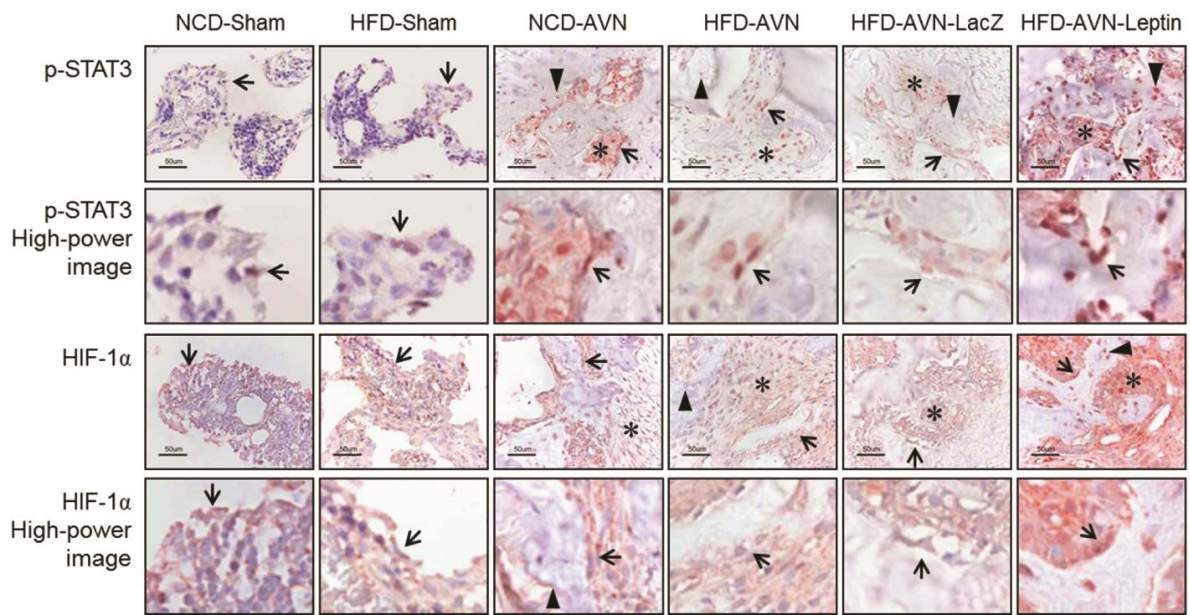

**Supplementary Figure 3. High power images (H &E, x400) stromal cells on bone surfaces.** Expression of phosphorylated STAT3 and HIF-1 $\alpha$  were stronger in osteoblasts (arrows), osteoblasts (arrow heads), and stromal fibroblasts (asterisks) in HFD-AVN-Leptin compared with HFD-AVN or HFD-AVN-LacZ. Phosphorylated STAT3 and HIF-1 $\alpha$  expression in NCD-AVN was intermediate between HFD-AVN-Leptin and HFD-AVN.

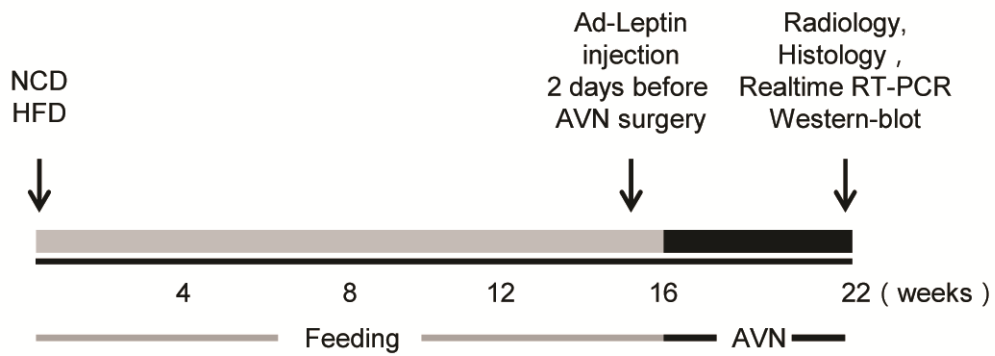

**Supplementary Figure 4. Experimental design.** After 16 weeks of NCD or HFD feeding, AVN was surgically induced. Ad-Leptin was by intravenous injection 2 days before surgery-induced AVN. Animals were euthanized at 6 weeks after inducing AVN.
